# Supplementary material for: Hierarchical high internal phase emulsions and transparent oleogels stabilized by quillaja saponin-coated nanodroplets for color performance
Source: Royal Society of Chemistry journal article supplement (doi:10.1039/c6fo01752e), 2017-01-01

## Supporting Information (SI)

### **Hierarchical High Internal Phase Emulsions and Transparent Oleogels Stabilized by *Quillaja* Saponin Coated Nanodroplets for Color Performance**

Xiao-Wei Chen,<sup>†</sup> Jin-Mei Wang,<sup>†</sup> Jian Guo,<sup>†</sup> Zhi-Li Wan,<sup>†</sup> Shou-Wei Yin,<sup>†</sup> and Xiao-Quan Yang<sup>\*†‡</sup>

<sup>†</sup>Food Protein Research and Development Center, Department of Food Science and Engineering,  
South China University of Technology, Guangzhou 510640, P. R China

<sup>‡</sup>Guangdong Province Key Laboratory for Green Processing of Natural Products and Product Safety,  
South China University of Technology, Guangzhou 510640, P. R China

**Running title:** Hierarchical Emulsions and Transparent Oleogels from *Quillaja* Saponin

**Corresponding to:** Xiao-Quan Yang

Tel: +86 20 87114262; Fax: +86 20 87114263

E-mail address: fexqyang@scut.edu.cn, [fexqyang@163.com](mailto:fexqyang@163.com)

21 **Figure S1.** Effect of saponin-coated nanodroplets concentration on the viscosity (filled symbols) and  
 22 shear stress (open symbols) of emulsions at room temperature.

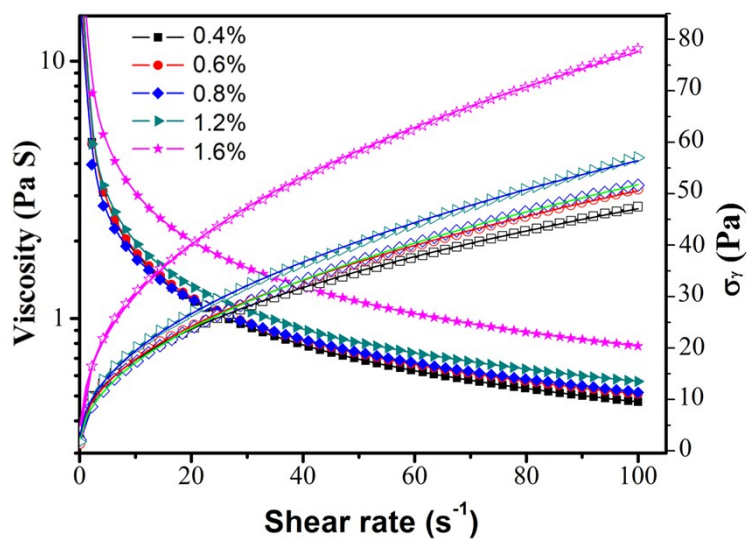

23  
 24 **Figure S2.** Effect of saponin-coated nanodroplets concentration on the viscosity of oleogels at room  
 25 temperature.

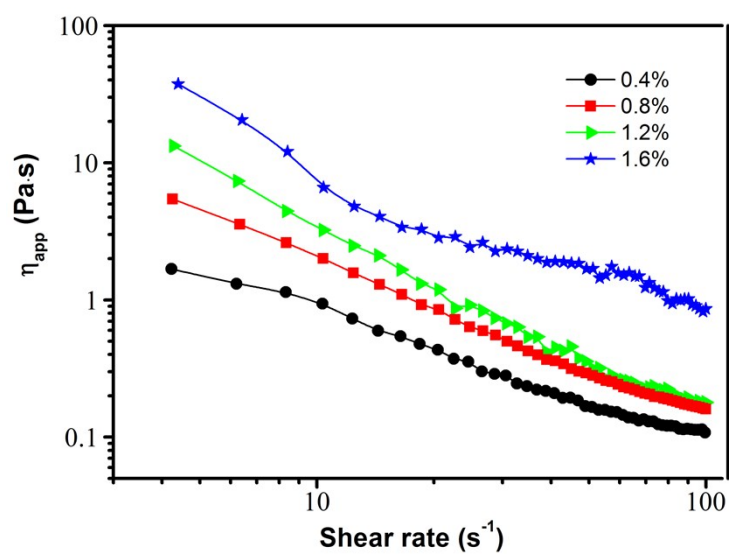

Supplement: c6fo01752e1.pdf [file c6fo01752e1.pdf]
